# Supplementary material for: Experimentally Deduced Criteria for Detection of Clinically Relevant Fusion 3′ Oncogenes from FFPE Bulk RNA Sequencing Data
Source: MDPI journal article supplement (doi:10.3390/biomedicines10081866), 2022-08-02
Supplement: s1 [file s1]

**Table S3. Oligonucleotide RT-PCR primer sequences**

| <b>Sample ID</b> | <b>Putative RTK fusion type</b>        | <b>Forward primer sequence (3'-5')</b>              | <b>Reverse primer sequence (3'-5')</b>     |
|------------------|----------------------------------------|-----------------------------------------------------|--------------------------------------------|
| A549             | <i>FGFR1 - BRF1</i>                    | <i>TCGTCCTCTGTGTCCTCCTC</i>                         | <i>TGGTCACAGCCACACTCT</i>                  |
| AL_7             | <i>RET - GART</i>                      | <i>GCTGAATTTTCTTGACCAGCATA<br/>TTTCCA</i>           | <i>GGGGCTGCGTCTGCTGTT</i>                  |
| AL_98            | <i>BCR - ABL1</i>                      | <i>CTGAGGCTCAAAGTCAGAT</i>                          | <i>ACCAACTCGTGTGTGAAA</i>                  |
| BC_105           | <i>FBXL20-ERBB2</i>                    | <i>ACTCTTTGCTCAGGGAGTAGCT<br/>TT</i>                | <i>GTTCTCAAATAGTGATGAAGCT<br/>GTAATCAA</i> |
| BC_105           | <i>ATP2B1-ERBB2</i>                    | <i>ATGTCCAGGTGGGTCTCGG</i>                          | <i>ACGAAAAATACAGGAAAGCTA<br/>TGGAGATG</i>  |
| BC_59            | <i>FGFR1 - REPS2</i>                   | <i>GGTCTTGGAGGGAGCGCA</i>                           | <i>GCTGGTCACAGCCCACTC</i>                  |
| EpS_1            | <i>HMBOX1-FGFR1</i>                    | <i>GGCTCCACATCTCCATGGAT<br/>ACTCCACAG</i>           | <i>GGAACCCGCCGGGGAGA</i>                   |
| FS_1             | <i>CCD6 - RET</i>                      | <i>ATTCGCCTTCTCCTAGAG</i>                           | <i>GCTGGAGACCTACAACTGA</i>                 |
| GC_30            | <i>ABL1 - ALDH1A2</i>                  | <i>TGGGATGATCTGTCCACAC</i>                          | <i>CAAATCCAAGAAGGGGCTG</i>                 |
| J_1              | <i>RBM18 - ABL1</i>                    | <i>AAAGGCTTGGTGGATTTC</i>                           | <i>TGATAAGATTCTTCCAATCAG</i>               |
| LuC_11           | <i>AL353743.1 - NTRK2</i>              | <i>TAGACTTTCCTTCCTCCAC</i>                          | <i>CAGATGATGGTACAGGAAAAC</i>               |
| LuC_19           | <i>NTRK2 - USP47</i>                   | <i>TTCAGTGTCTTTGAATTAGTAGT<br/>ATCTTGATAAATACAT</i> | <i>GCGTTCGCGCACACCCT</i>                   |
| LuC_46           | <i>SLC34A2 (exon 4)-ROS1 (exon 33)</i> | <i>CACTGTATTGAATTTTACTCCC<br/>TTCTAGTAAT</i>        | <i>TTTTTCGTGTGCTCCCTGGAT</i>               |
| LuC_46           | <i>SLC34A2 (exon 4)-ROS1 (exon 34)</i> | <i>AAATGTCATCTTCCACCTTAAAT<br/>TCT</i>              | <i>CTCTACTTTTTCGTGTGCTCCC<br/>T</i>        |
| LuC_46           | <i>SLC34A2 (exon 4)-ROS1 (exon 35)</i> | <i>TCCAACATAAATAGTAAGTATGA<br/>AACTTGT</i>          | <i>TTTCTCTACTTTTTCGTGTGCT<br/>C</i>        |

|        |                                                      |                                                  |                                                |
|--------|------------------------------------------------------|--------------------------------------------------|------------------------------------------------|
| LuC_46 | <i>SLC34A2</i><br>(exon 5)-<br><i>ROS1</i> (exon 29) | <i>CCAACAAAGGGTTGGACATAAT</i><br><i>AGA</i>      | <i>ACATTTACCACCAGGAAAAGA</i><br><i>GA</i>      |
| LuC_71 | <i>NTRK2</i> -<br><i>AL157886.1</i>                  | <i>GCACAGAGAGTTGGAAGGCGA</i>                     | <i>AATGAGTATGGGAAGGATGAG</i><br><i>AAACAGA</i> |
| LuC_81 | <i>NTRK2-ETNK</i>                                    | <i>CGTTGATGATTCTAACCTTTTC</i><br><i>TGGTTTGC</i> | <i>GGCCCTGAGCCTCCTGC</i>                       |
| OC_11  | <i>FGFR2-LGSN</i>                                    | <i>CTTAATGTGTTTCATGCTGTTG</i>                    | <i>CAGTTGGTAGAAGACTTGG</i>                     |
| OC_11  | <i>RPS24</i> -<br><i>FGFR2</i>                       | <i>GTCAGGGTAACTAGGTGAATAC</i><br><i>TGT</i>      | <i>AAGAAAGTCAGGGGGACTGCA</i><br><i>AA</i>      |
| OC_15  | <i>ABL1-FNIP2</i>                                    | <i>CACTCCATTTATCCGTGTCTGC</i><br><i>GA</i>       | <i>GGCGTGTGGAAGAAATACAGC</i><br><i>CT</i>      |
| PC_24  | <i>DOCK1-</i><br><i>FGFR2</i>                        | <i>CATCCAGAACTCTACTGCTTG</i><br><i>ATCGAAA</i>   | <i>CAAAATCTTCCGCACCATCGG</i><br><i>TGTC</i>    |
| SkC_1  | <i>ABL1-CD59</i>                                     | <i>AGCAGCCCGAACAGGACA</i>                        | <i>TCAAAGGAGCAGGGAAGAAG</i><br><i>GAA</i>      |
| XC_1   | <i>FGFR2-</i><br><i>NFYC</i>                         | <i>GGCTTTGCTGGGCATCAC</i>                        | <i>ATGGCAACCTTGTCCTG</i>                       |
