# Supplementary material for: Experimentally Deduced Criteria for Detection of Clinically Relevant Fusion 3′ Oncogenes from FFPE Bulk RNA Sequencing Data
Source: MDPI journal article supplement (doi:10.3390/biomedicines10081866), 2022-08-02
Supplement: s1 [file s1]

**Table S2. The description of patients biosamples in experimental dataset.**

| Sample ID | Putative RTK fusion type | Gender | Age | Cancer type                                                        | TNM        | Grade |
|-----------|--------------------------|--------|-----|--------------------------------------------------------------------|------------|-------|
| AL-44     | <i>FGFR1-AZIN1</i>       | male   | 2   | Acute lymphoblastic leukemia                                       | NA         | NA    |
| AL-7      | <i>RET-GART</i>          | female | 2   | Acute myeloid leukemia                                             | NA         | NA    |
| AL-98     | <i>BCR - ABL1</i>        | male   | 5   | Acute lymphoblastic leukemia                                       | NA         | NA    |
| BC-105    | <i>ATP2B1-ERBB2</i>      | female | 52  | Breast cancer                                                      | T2N3M0     | G3    |
|           | <i>FBXL20-ERBB2</i>      |        |     |                                                                    |            |       |
| BC-59     | <i>FGFR1-REPS2</i>       | female | 61  | Breast cancer                                                      | T1N1M0     | G3    |
| EpS-1     | <i>HMBOX1-FGFR1</i>      | male   | 60  | Epithelioid sarcoma                                                | T4bN0M0    | G3    |
| FS-1      | <i>CCDC6 - RET</i>       | female | 58  | Breast fibrosarcoma                                                | NA         | G3    |
| GC-30     | <i>ABL1-ALDH1A2</i>      | female | 61  | Pseudomyxoma peritonei                                             | pT4bpN3pM1 | G3    |
| LuC-11    | <i>KIF27-NTRK2</i>       | male   | 52  | Lung cancer (squamous cell carcinoma)                              | T2N2M0     | NA    |
| LuC-19    | <i>NTRK2-USP47</i>       | male   | 65  | Lung cancer (squamous cell carcinoma)                              | T2N0M0     | G2    |
| LuC-46    | <i>SLC34A2-ROSI</i>      | female | 48  | Lung cancer (adenocarcinoma)                                       | NA         | NA    |
| LuC-71    | <i>NTRK2-AL157886.1</i>  | male   | 60  | Lung cancer (mixed type: adenocarcinoma + squamous cell carcinoma) | T2N2M0     | G2    |
| LuC-81    | <i>NTRK2-ETNK1</i>       | male   | 54  | Lung cancer (squamous cell carcinoma)                              | T2N0M1     | NA    |
| OC-11     | <i>FGFR2 - LGSN</i>      | female | 38  | Ovarian cancer                                                     | T3cNkhM1   | G3    |
|           | <i>RPS24-FGFR2</i>       |        |     |                                                                    |            |       |
| OC-15     | <i>ABL1-FNIP2</i>        | female | 48  | Ovarian cancer                                                     | NA         | NA    |
| PC-24     | <i>DOCK1-FGFR2</i>       | female | 60  | Pancreatic cancer                                                  | cT4N1M1    | G3    |
| SkC-1     | <i>ABL1-CD59</i>         | male   | 34  | Sarcoma Kaposi                                                     | NA         | NA    |
| XC-1      | <i>FGFR2-NFYC</i>        | female | 58  | Non-gestational choriocarcinoma                                    | TxN1M1     | NA    |
